# Supplementary material for: Breakdown of Whole-brain Dynamics in Preterm-born Children
Source: PubMed Central journal article supplement — Cereb Cortex. 2019 Aug 23;30(3):1159–70. doi: 10.1093/cercor/bhz156 (PMC7132942; doi:10.1093/cercor/bhz156), 2019-08-23
Supplement: 00_supplementary_tables_12_june_bhz156.pdf [file 00_supplementary_tables_12_june_bhz156.pdf]

**Supplementary Table S1. Anatomical Atlas Labeling**

| AAL region               | Abbreviation | AAL region         | Abbreviation |
|--------------------------|--------------|--------------------|--------------|
| Precentral               | Precen       | Lingual            | Ling         |
| Frontal_Sup dorsolateral | DISupF       | Occipital_Sup      | SupO         |
| Frontal_Sup_Orb          | OrSupF       | Occipital_Mid      | MidO         |
| Frontal_Mid              | MidF         | Occipital_Inf      | InfO         |
| Frontal_Mid_Orb          | OrMidF       | Fusiform           | Fus          |
| Frontal_Inf_Oper         | OpInfF       | Postcentral        | Postc        |
| Frontal_Inf_Tri          | TrinF        | Parietal_Sup       | SupP         |
| Frontal_Inf_Orb          | OrinfF       | Parietal_Inf       | InfP         |
| Rolandic_Oper            | Rolan        | SupraMarginal      | SupraM       |
| Supp_Motor_Area          | SupplM       | Angular            | Ang          |
| Olfactory                | MedOlf       | Precuneus          | Precu        |
| Frontal_Sup_Medial       | MSupF        | Paracentral_Lobule | Parac        |
| Frontal_Med_Orb          | MOSupF       | Caudate            | Caud         |
| Rectus                   | GyrR         | Putamen            | Put          |
| Insula                   | Ins          | Pallidum           | Pall         |
| Cingulum_Ant             | AntCG        | Thalamus           | Thal         |
| Cingulum_Mid             | MidCG        | Heschl             | Heschl       |
| Cingulum_Post            | PostCG       | Temporal_Sup       | SupT         |
| Hippocampus              | Hipp         | Temporal_Pole_Sup  | TPsupT       |
| ParaHippocampal          | ParaHG       | Temporal_Mid       | midT         |
| Amygdala                 | Amyg         | Temporal_Pole_Mid  | TPmidT       |
| Calcarine                | Calc         | Temporal_Inf       | InfT         |
| Cuneus                   | Cun          |                    |              |

**Supplementary Table S2. Neonatal characteristics of the preterm children**

| <b>Morbidity</b>                                                                                           | <b>Ignition</b><br>N=33 | <b>Hopf</b><br>N=28    |
|------------------------------------------------------------------------------------------------------------|-------------------------|------------------------|
| Antenatal steroids, n (%)                                                                                  | 29 (90.6)               | 24 (85.7)              |
| Apgar score at 5 minutes, mode (range)                                                                     | 8.0 (6-10)              | 8.0 (6-10)             |
| Small for gestational age (birth weight for gestational age < -2SD), according to the Swedish growth curve | 2 (6.0)                 | 2 (7.1)                |
| Clinical risk index for babies (CRIB) score, mean $\pm$ SD                                                 | 5.0 $\pm$ 3.7           | 5.5 $\pm$ 3.7          |
| Days on ventilator, mean $\pm$ SD (range)                                                                  | 9.7 $\pm$ 12.9 (0-43)   | 11.4 $\pm$ 13.4 (0-43) |
| Postnatal corticosteroid therapy, n (%)                                                                    | 4 (12.1)                | 4 (14.3)               |
| Bronchopulmonary dysplasia, * n (%)                                                                        | 9 (27.3)                | 9 (32.1)               |
| Sepsis (clinical diagnosis), n (%)                                                                         | 22 (66.6)               | 19 (67.8)              |
| Necrotizing enterocolitis, n (%)                                                                           | 1 (3.12)                | 1 (3.6)                |
| Patent ductus arteriosus treated with surgery, n (%)                                                       | 8/32 (25.0)             | 7 (25.0)               |
| Patent ductus arteriosus treated with ibuprofen, n (%)                                                     | 19/32 (59.3)            | 15 (53.5)              |
| Intraventricular hemorrhage low-grade, n (%)                                                               | 9 (27.7)                | 9 (32.1)               |
| Mild white matter abnormalities (score 7-9), n (%)                                                         | 13 (39.3)               | 11 (39.2)              |
| Retinopathy of prematurity, n (%)                                                                          | 23 (69.6)               | 21 (75.0)              |

\* Oxygen at 36 weeks of gestation. Information regarding patent ductus arteriosus was missed in one neonate in the ignition analysis.
