# Supplementary material for: Breakdown of Whole-brain Dynamics in Preterm-born Children
Source: PubMed Central journal article supplement — Cereb Cortex. 2019 Aug 23;30(3):1159–70. doi: 10.1093/cercor/bhz156 (PMC7132942; doi:10.1093/cercor/bhz156), 2019-08-23
Supplement: supplementary_figure_2_legend_bhz156.pdf [file supplementary_figure_2_legend_bhz156.pdf]

Supplementary Figure 2. Permutation test for comparing kurtosis, second order raw moment and the median between distributions. Grey line represents the observed absolute difference delta for each statistic. Blue delta random distributions are generated from 1,000 random surrogates (see Methods). Significance (P value) is considered as the proportion of observed delta values higher than those of the random surrogates. A complete node list can be found in Supplementary Table S1.
